# Supplementary material for: Phenotypic and genotypic characteristics of ESBL and AmpC producing organisms associated with bacteraemia in Ho Chi Minh City, Vietnam
Source: PubMed Central journal article supplement (PMC5644090; doi:10.1186/s13756-017-0265-1), 2017-10-16
Supplement: 13756_2017_265_MOESM1_ESM.pdf [file 13756_2017_265_MOESM1_ESM.pdf]

**A**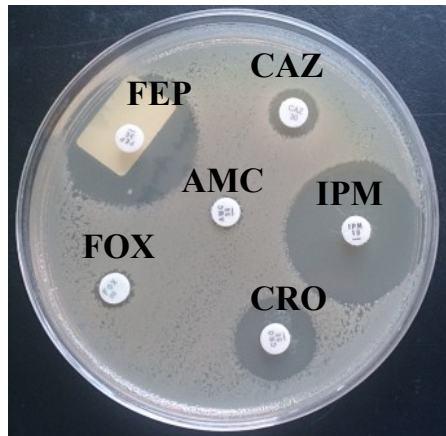

AmpC +

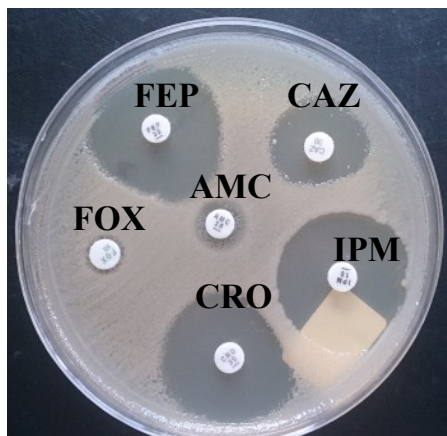

AmpC +

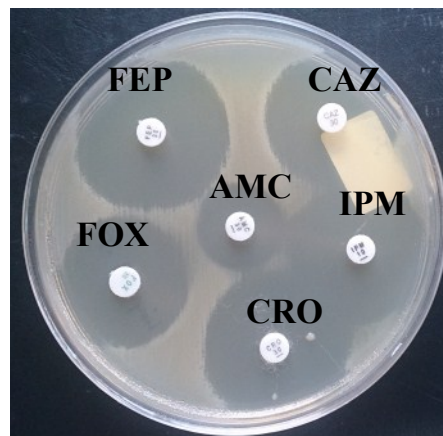

AmpC -

Decreased susceptibility  
methodInducible test  
method

AmpC negative

**B**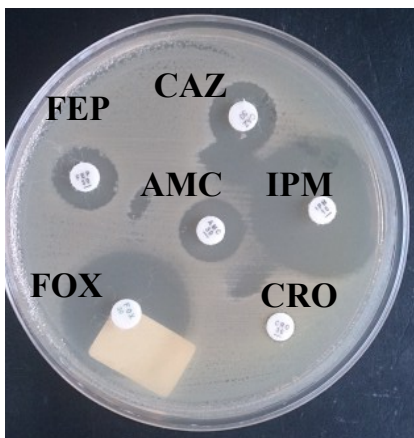

ESBL +

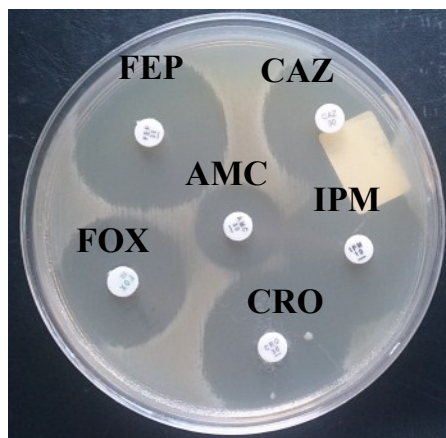

ESBL -

Double disk method

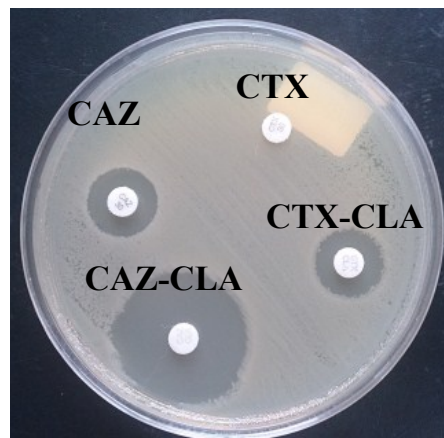

ESBL +

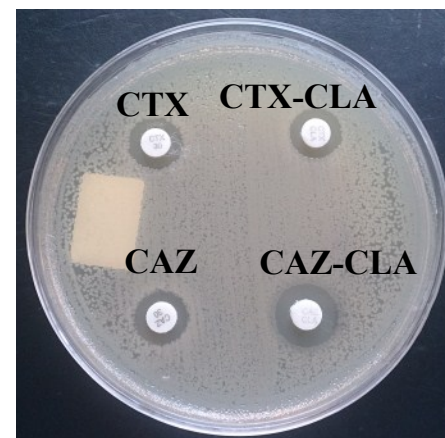

ESBL -

Combination disk method
