# Supplementary material for: Phenotypic and genotypic characteristics of ESBL and AmpC producing organisms associated with bacteraemia in Ho Chi Minh City, Vietnam
Source: PubMed Central journal article supplement (PMC5644090; doi:10.1186/s13756-017-0265-1), 2017-10-16

**A**

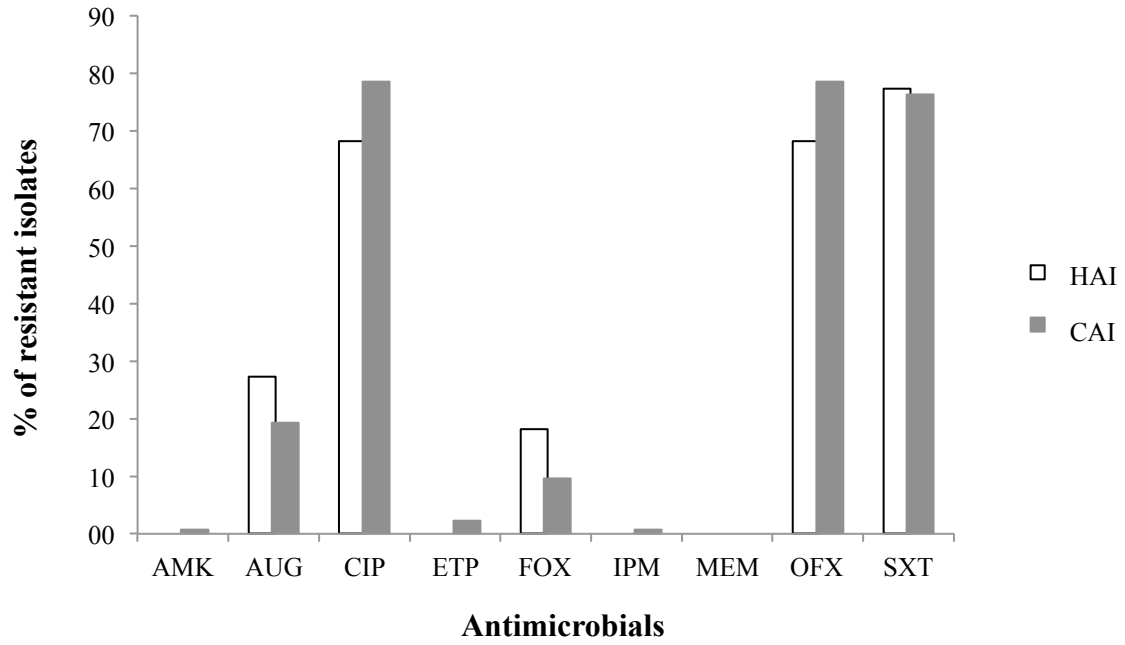

**B**

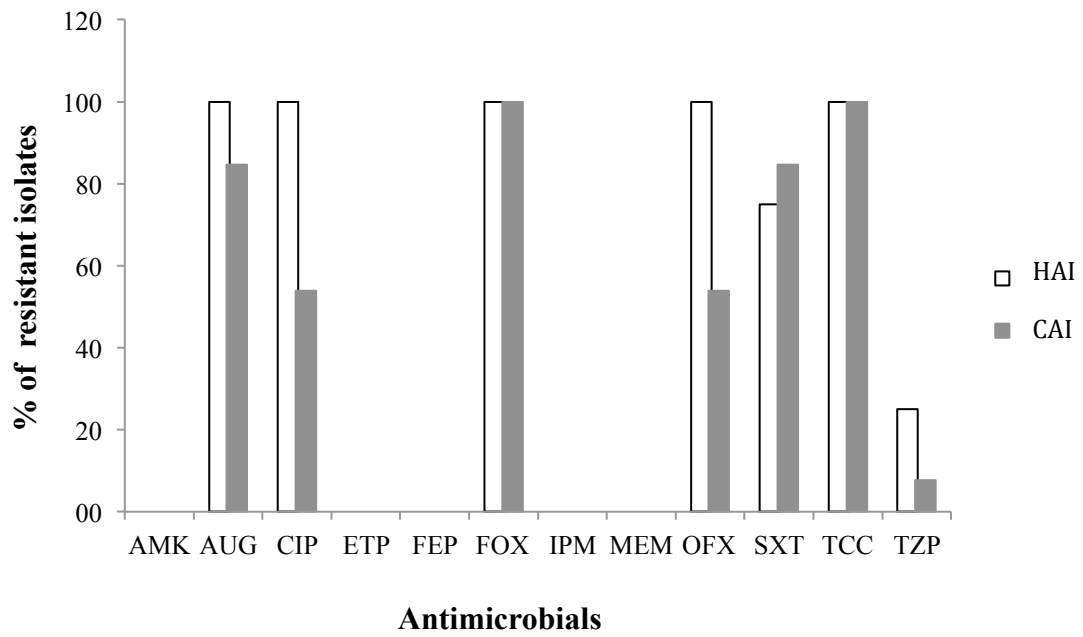

Supplement: 13756_2017_265_MOESM5_ESM.pdf [file 13756_2017_265_MOESM5_ESM.pdf]
